# Supplementary material for: Decoding speech from spike-based neural population recordings in secondary auditory cortex of non-human primates
Source: PubMed Central journal article supplement (PMC6906475; doi:10.1038/s42003-019-0707-9), 2019-12-11
Supplement: 42003_2019_707_MOESM1_ESM.pdf [file 42003_2019_707_MOESM1_ESM.pdf]

## Supplementary Figures

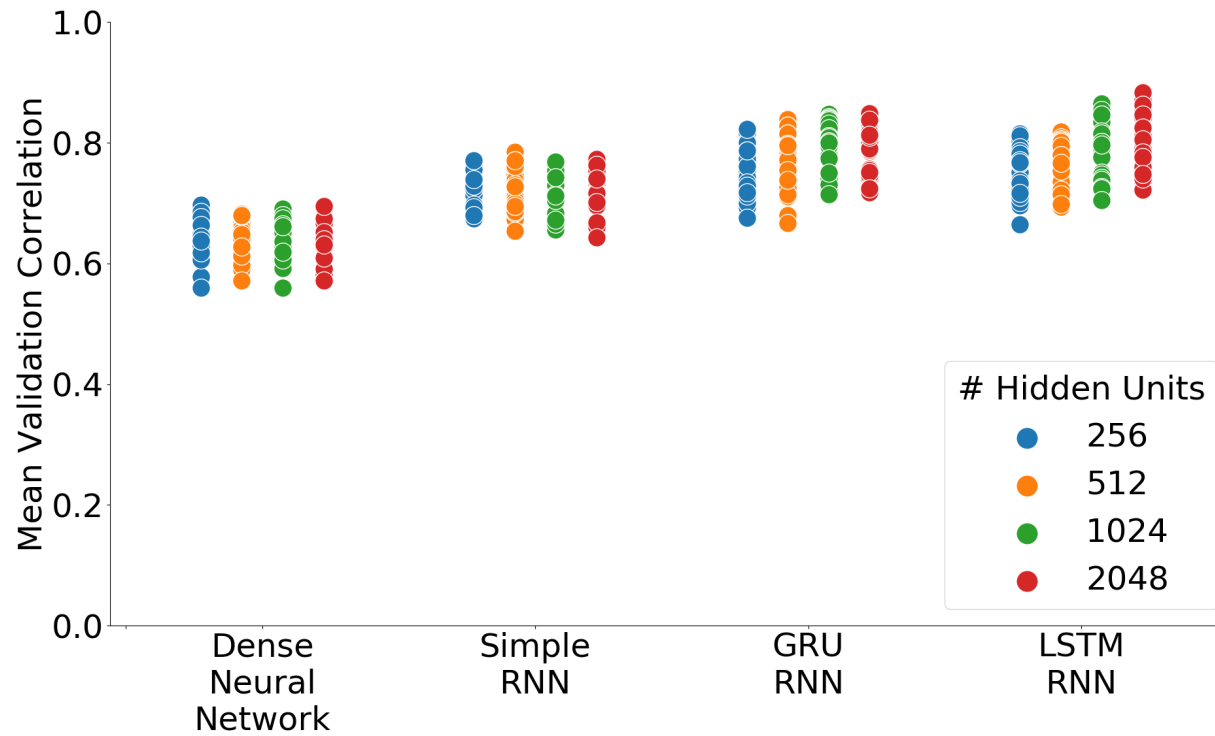

Supplementary Figure 1: The optimal number of hidden units for neural network decoders varied across network types. The top-performing LSTM RNN algorithm achieved its highest decoding performance with a larger number of hidden units (2048).

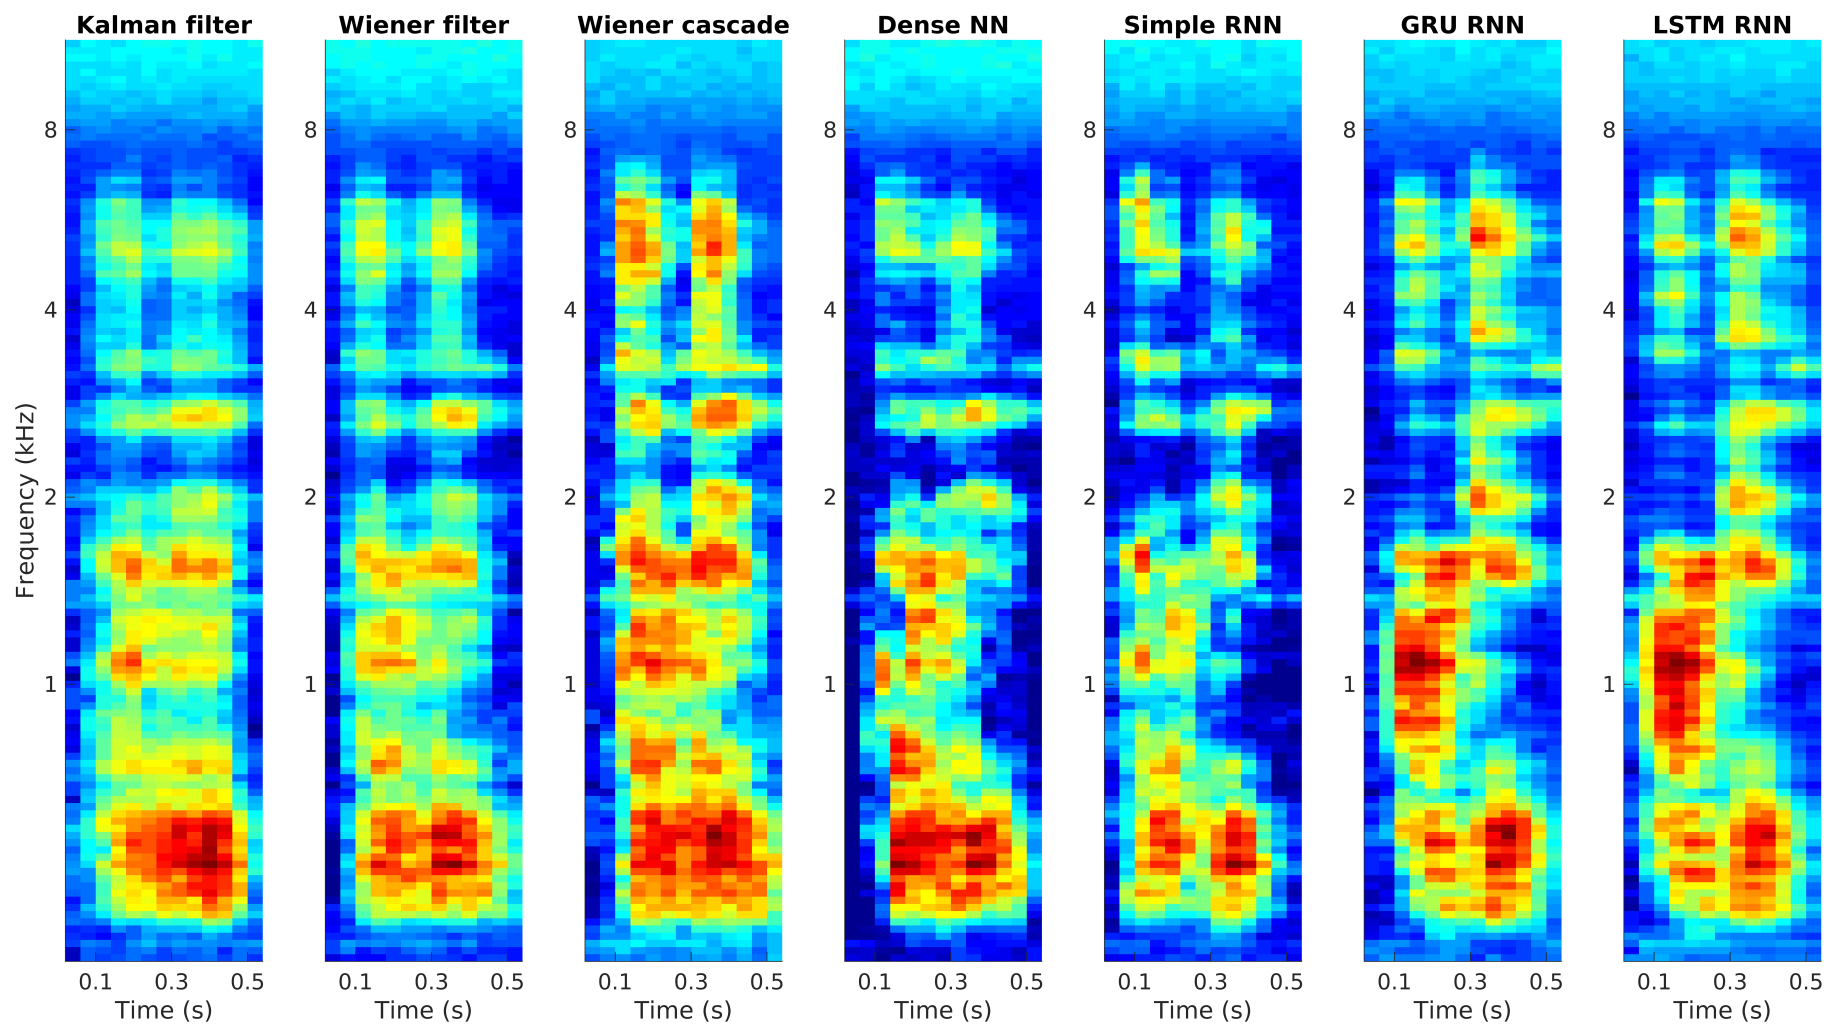

Supplementary Figure 2: Each mel-spectrogram shows a reconstruction of the word "cricket" generated by the top-performing model for each algorithm.

## Supplementary Tables

Supplementary Table 1: The results of the decoding algorithm multiple comparisons Tukey-type test.

| B                    | A                    | Correlation B | Correlation A | Adjusted p-value | Result                                                 |
|----------------------|----------------------|---------------|---------------|------------------|--------------------------------------------------------|
| LSTM RNN             | GRU RNN              | 0.88          | 0.85          | 0.175            | Correlations NOT significantly different               |
| LSTM RNN             | Simple RNN           | 0.88          | 0.78          | 0.001            | Correlation B significantly greater than Correlation A |
| LSTM RNN             | Dense Neural Network | 0.88          | 0.69          | 0.001            | Correlation B significantly greater than Correlation A |
| LSTM RNN             | Wiener Cascade       | 0.88          | 0.67          | 0.001            | Correlation B significantly greater than Correlation A |
| LSTM RNN             | Wiener Filter        | 0.88          | 0.60          | 0.001            | Correlation B significantly greater than Correlation A |
| LSTM RNN             | Kalman Filter        | 0.88          | 0.57          | 0.001            | Correlation B significantly greater than Correlation A |
| GRU RNN              | Simple RNN           | 0.85          | 0.78          | 0.017            | Correlation B significantly greater than Correlation A |
| GRU RNN              | Dense Neural Network | 0.85          | 0.69          | 0.001            | Correlation B significantly greater than Correlation A |
| GRU RNN              | Wiener Cascade       | 0.85          | 0.67          | 0.001            | Correlation B significantly greater than Correlation A |
| GRU RNN              | Wiener Filter        | 0.85          | 0.60          | 0.001            | Correlation B significantly greater than Correlation A |
| GRU RNN              | Kalman Filter        | 0.85          | 0.57          | 0.001            | Correlation B significantly greater than Correlation A |
| Simple RNN           | Dense Neural Network | 0.78          | 0.69          | 0.017            | Correlation B significantly greater than Correlation A |
| Simple RNN           | Wiener Cascade       | 0.78          | 0.67          | 0.001            | Correlation B significantly greater than Correlation A |
| Simple RNN           | Wiener Filter        | 0.78          | 0.60          | 0.001            | Correlation B significantly greater than Correlation A |
| Simple RNN           | Kalman Filter        | 0.78          | 0.57          | 0.001            | Correlation B significantly greater than Correlation A |
| Dense Neural Network | Wiener Cascade       | 0.69          | 0.67          | 0.900            | Correlations NOT significantly different               |
| Dense Neural Network | Wiener Filter        | 0.69          | 0.60          | 0.086            | Correlations NOT significantly different               |
| Dense Neural Network | Kalman Filter        | 0.69          | 0.57          | 0.006            | Correlation B significantly greater than Correlation A |
| Wiener Cascade       | Wiener Filter        | 0.67          | 0.60          | 0.437            | Correlations NOT significantly different               |
| Wiener Cascade       | Kalman Filter        | 0.67          | 0.57          | 0.076            | Correlations NOT significantly different               |
| Wiener Filter        | Kalman Filter        | 0.60          | 0.57          | 0.900            | Correlations NOT significantly different               |
